# Supplementary material for: Novel insights into the effect of drought stress on the development of root and caryopsis in barley
Source: PeerJ. 2020 Jan 31;8:e8469. doi: 10.7717/peerj.8469 (PMC6996498; doi:10.7717/peerj.8469)
Supplement: Data S1 [file peerj-08-8469-s001.xlsx]

## Sheet: ROOT WEIGHT
			Fresh and dry weight of root
	Fresh weight of root/g						Dry weight of root/g
Days post anthesis	Treatment	R1	R2	R3		Days post anthesis	Treatment	R1	R2	R3
10DPA	CC	3.951	3.828	2.032		10DPA	CC	0.576	0.441	0.779
	DS	4.302	3.811	3.037			DS	1.065	0.828	1.136
20DPA	CC	2.976	2.213	3.043		20DPA	CC	0.666	0.521	1.103
	DS	4.022	3.263	5.028			DS	1.219	1.287	1.496
30DPA	CC	0.911	1.515	1.142		30DPA	CC	0.319	0.392	0.611
	DS	1.372	1.066	1.355			DS	0.514	0.387	0.582

## Sheet: CARYOPSIS WEIGHT
			Fresh and dry weight of caryopses
	Fresh weight of 1000 grains/g						Dry weight of 1000 grains/g
Days post anthesis	Treatment	R1	R2	R3		Days post anthesis	Treatment	R1	R2	R3
10DPA	CC	36.326	37.467	38.854		10DPA	CC	10.235	11.302	12.398
	DS	40.417	41.119	40.955			DS	13.246	15.254	12.096
20DPA	CC	58.32	57.286	59.021		20DPA	CC	25.596	22.972	23.256
	DS	58.583	59.825	57.499			DS	25.996	27.371	26.858
30DPA	CC	48.625	47.901	49.066		30DPA	CC	41.712	40.183	42.013
	DS	44.524	45.011	44.157			DS	31.917	31.814	37.383

## Sheet: ROOT-SHOOT RATIO
					Root-shoot ratio
				Days post anthesis	Treatment	R1	R2	R3
				10DPA	CC	0.293017	0.42247	0.355662
					DS	0.432084	0.37686	0.37379
				20DPA	CC	0.135083	0.109935	0.129976
					DS	0.148616	0.245953	0.187513
				30DPA	CC	0.0953727	0.0959843	0.117698
					DS	0.187117	0.197351	0.150022

## Sheet:  ROOT VESSEL
						Area of root vessel transversal section/μm2
				Days post anthesis	Treatment	R1	R2	R3
				10DPA	CC	770.201	858.031	697.401
					DS	564.955	588.344	635.647
				20DPA	CC	611.084	646.159	624.195
					DS	266.82	317.824	315.92
				30DPA	CC	1258.72	1324.35	1203
					DS	1015.5	1225.12	1177.03

## Sheet: NDOSPERM STARCH AND PROTEIN 
Relative areas of protein bodies in endosperm cells/%							Relative areas of starch granules in endosperm cells/%							Number of starch granules in endosperm cells/No.
Days post anthesis	Treatment	R1	R2	R3			Days post anthesis	Treatment	R1	R2	R3			Days post anthesis	Treatment	R1	R2	R3
10DPA	DECC	0.48317	0.725796	0.684572			10DPA	DECC	4.04517	3.46968	5.91045			10DPA	DECC	4	3	5
	DEDS	1.03171	1.03904	1.14333				DEDS	18.878	16.0518	15.4152				DEDS	10	14	12
	AECC	0.30922	0.907163	1.06884				AECC	2.65302	2.16596	2.45078				AECC	6	4	7
	AEDS	1.2395	1.24827	1.057				AEDS	23.9375	19.6214	26.8285				AEDS	14	16	12
20DPA	DECC	1.33285	1.63392	1.49387			20DPA	DECC	34.4067	37.7036	39.9168			20DPA	DECC	30	36	32
	DEDS	1.64807	1.48336	1.84403				DEDS	30.9969	30.6556	33.6457				DEDS	31	28	35
	AECC	1.32815	1.62449	1.42015				AECC	31.7006	37.8694	30.168				AECC	32	37	40
	AEDS	2.50106	2.42541	2.06446				AEDS	35.6728	30.0984	28.1661				AEDS	33	29	28
30DPA	DECC	1.85018	1.74551	1.37584			30DPA	DECC	44.2042	44.4512	38.1051			30DPA	DECC	70	63	57
	DEDS	2.64096	3.21415	2.6591				DEDS	29.0936	28.2261	30.6518				DEDS	50	43	44
	AECC	3.09097	3.41969	2.76808				AECC	35.8761	36.5957	34.8693				AECC	59	54	51
	AEDS	4.18624	4.29854	4.08461				AEDS	28.622	26.7697	31.3512				AEDS	31	43	39

## Sheet: UP AND DOWN REGULATED
				Up-regulated and down-regulated genes in barley caryopses under DS
						Up-regulated	Down-regulated	Total DEGs
					CC vs. DS	1192	1450	2642

## Sheet: FUNCTION OF DEGs
		GO enrichment and KEGG pathway analysis of DEGs
Number of DEGs in GO terms involved in protein biosynthesis				Number of DEGs in KEGG pathway involved in protein biosynthesis
	Description	Number of DEGs			Description	Number of DEGs
	Protein binding	198			Protein processing in endoplasmic reticulum	20
	Unfolded protein binding	5			Protein export	3
	Protein deubiquitination	1			Ribosome biogenesis in eukaryotes	5
	tRNA aminoacylation for protein translation	2			Various types of N-glycan biosynthesis	1
	Clathrin-coated vesicle	2			Aminoacyl-tRNA biosynthesis	6
	Clathrin binding	2
	Clathrin coat assembly	2
	Protein transport	4
	Protein heterodimerization activity	96
	Protein metabolic process	2
	TBP-class protein binding	1
	Heat shock protein binding	1
	Protein folding	5
	Intracellular protein transport	2

## Sheet: PCR PROTOCOL
mRNA Fragmentation
Reagent	Volumn for one reaction	Program
rRNA Depleted Total RNA	5μL	a) 94 °C for 15 min b) Hold at 4 °C
NEBNext First Strand Synthesis Reaction Buffer (5Î)	4μL
Random Primers	1μL
Total	10μL
First Strand cDNA Synthesis
Reagent	Volumn for one reaction	Program
Fragmented and Primed mRNA	15μL	a) 25 °C for 10 min b) 42 °C for 50 min c) 70 °C for 15 min d) Hold at 4 °C
RNase Inhibitor	0.5μL
ProtoScript II Reverse Transcriptase	1μL
Nuclease-free Water	3.5μL
Total	20μL
Second Strand cDNA Synthesis
Reagent	Volumn for one reaction	Program
First Strand cDNA	20μL	16°C for 1 h
Nuclease-free Water	48μL
Second Strand Synthesis Reaction Buffer (10Î)	8μL
Second Strand Synthesis Enzyme Mix	4μL
Total	80μL
End Repair and A-Tailing
Reagent	Volumn for one reaction	Program
ds cDNA	55.5μL	a) 20 °C for 30 min b) 65 °C for 30 min c) Hold at 4 °C
NEBNext End Repair Reaction Buffer (10Î)	6.5μL
NEBNext End Prep Enzyme Mix	3μL
Total	65μL
Adaptor Ligation
Reagent	Volumn for one reaction	Program
dA-Tailed cDNA	65μL	20 °C for 15 min
Blunt/TA Ligase Master Mix	15μL
Diluted NEBNext Adaptor	1μL
Nuclease-free Water	2.5μL
Total	83.5μL
USER Enzyme	3μL	37 °C for 15 min
Total	86.5μL
Nuclease-free Water	13.5μL	Magnetic Beads Purification
Total	100μL
PCR Amplification
Reagent	Volumn for one reaction	Program
DNA with Adaptor	20μL	a) 98 °C for 30 s b) 12 cycles of ： 98 °C for 10 s 65 °C for 75 s c) 65 °C for 5 min d) Hold at 4 °C
NEBNext Q5 Hot Start HiFi PCR Master Mix (2Î)	25μL
Universal PCR Primer (10 μM)	2.5μL
Index (X) Primer (10 μM)	2.5μL
Total	50μL

## Sheet: DIFFERENTIAL EXPRESSION OF GENE
		Differential expression of genes encoding caryopses storage protein
gene ID	baseMean	baseMean_control	baseMean_drought stress	foldChange	log2FoldChange	pvalue	pvalue-adjusted	up_down	description
HORVU1Hr1G000540	2497.69	3483.37	1512.01	0.434066	-1.20401	0.017812	0.0659005	Down	Omega-gliadin
HORVU1Hr1G000640	261039	362847	159231	0.438837	-1.18824	3.49e-22	1.07e-20	Down	Gamma-gliadin
HORVU1Hr1G005150	484044	754338	213751	0.283362	-1.81928	3.22872e-09	4.07835e-08	Down	Hor1-17 C-hordein
HORVU1Hr1G064080	168854	258371	79337	0.307066	-1.70338	6.00788e-60	6.67305e-58	Down	Glutenin, high molecular weight subunit 12
HORVU1Hr1G066650	93022.8	140559	45487.1	0.323617	-1.62764	6.17074e-24	2.07988e-22	Down
HORVU1Hr1G000990	451989	624681	279297	0.447104	-1.16132	3.8e-155	1.67e-152	Down	Low molecular weight glutenin subunit
HORVU1Hr1G001020	188954	279488	98420.5	0.352146	-1.50575	2.08e-39	1.28e-37	Down
HORVU1Hr1G001080	2763.73	4053.92	1473.55	0.363488	-1.46002	3.57e-06	3.04e-05	Down
HORVU1Hr1G001140	186519	269247	103792	0.38549	-1.37524	6.11e-12	9.72e-11	Down
HORVU1Hr1G001350	87949.6	134605	41293.7	0.306776	-1.70474	3.11e-69	4.36e-67	Down
HORVU1Hr1G001420	66.1535	89.5985	42.7085	0.476665	-1.06895	0.0355016	0.118018	Down
HORVU1Hr1G005460	66216	92857.2	39574.8	0.42619	-1.23043	0.00147072	0.00758525	Down
HORVU1Hr1G008130	3708.7	2388.78	5028.62	2.1051	1.07389	3.71725e-67	4.8442e-65	Up	11S seed storage protein
HORVU3Hr1G116010	17.4709	31.2793	3.66253	0.117091	-3.09429	2.95201e-05	0.000217306	Down	11S seed storage protein
HORVU7Hr1G119320	21.5832	30.5498	12.6167	0.412987	-1.27583	0.0334253	0.112173	Down
HORVU4Hr1G008420	59.9087	30.7493	89.0681	2.89659	1.53436	0.00124043	0.00651758	Up	Seed storage 2S albumin superfamily protein
HORVU4Hr1G071790	17.9602	6.18705	29.7334	4.80574	2.26476	0.00135983	0.00707436	Up
HORVU7Hr1G105910	476.981	289.621	664.342	2.29384	1.19776	7.62663e-20	2.06334e-18	Up
HORVU7Hr1G106040	748.303	336.467	1160.14	3.448	1.78576	4.10583e-57	4.4115e-55	Up
HORVU7Hr1G106130	2705.39	1365.51	4045.27	2.96246	1.5668	1.00033e-30	4.44807e-29	Up
HORVU0Hr1G022170	755.94	372.77	1139.11	3.0558	1.61155	3.15433e-29	1.32431e-27	Up
HORVU2Hr1G080570	16.9144	7.40519	26.4236	3.56825	1.83522	0.0094909	0.0386627	Up
HORVU2Hr1G099450	12.5015	1.80311	23.1999	12.8666	3.68556	0.000214527	0.00132907	Up
HORVU4Hr1G074480	263.449	389.618	137.281	0.352347	-1.50493	1.732e-18	4.32984e-17	Down	Seed storage 2S albumin superfamily protein
HORVU4Hr1G087780	186.976	309.297	64.655	0.209039	-2.25816	2.169e-10	3.07136e-09	Down
HORVU5Hr1G109240	18.636	30.357	6.91493	0.227787	-2.13424	0.00131948	0.00688346	Down
HORVU7Hr1G027440	1529.05	2320.38	737.719	0.317931	-1.65322	4.26187e-90	8.37235e-88	Down
HORVU7Hr1G115810	28.3734	42.0565	14.6903	0.349299	-1.51746	0.0382781	0.125559	Down
HORVU7Hr1G115830	63.1743	105.592	20.7563	0.19657	-2.34689	6.72104e-11	9.88959e-10	Down
HORVU1Hr1G054040	74.0791	139.597	8.56122	0.0613281	-4.02731	8.90911e-26	3.2348e-24	Down
